# Supplementary material for: tbiExtractor: A framework for extracting traumatic brain injury common data elements from radiology reports
Source: PLOS journal article supplement (doi:10.1371/journal.pone.0214775), 2020-07-01
Supplement: S4 (10.1371/journal.pone.0214775.s004) [file journal.pone.0214775.s004]

#### S4. Classification Performance Metrics Equations

$$\text{Sensitivity} = \frac{TP}{TP+FN}$$

$$\text{Specificity} = \frac{TN}{TN+FP}$$

$$\text{Positive Predictive Value} = \frac{TP}{TP+FP}$$

$$\text{Negative Predictive Value} = \frac{TN}{TN+FN}$$

$$\text{Accuracy} = \frac{TP+TN}{TP+FP+TN+FN}$$

$$\text{F1 Score} = \frac{2*PPV*Sensitivity}{PPV+Sensitivity}$$
